# Supplementary material
Source: PubMed Central journal article supplement (PMC2490781)
Supplement: M708582200_1.pdf [file M708582200_1.pdf]

**Identification and Analysis of Conserved Sequence Motifs in Cytochrome P450 Family 2:  
Functional and Structural Role of a Motif <sup>187</sup>RFDYKD<sup>192</sup> in CYP2B Enzymes**

<sup>2</sup>Numan Oezguen<sup>¶</sup>, <sup>1</sup>Santosh Kumar<sup>¶\*</sup>, <sup>2</sup>Aditya Hindupur, <sup>2</sup>Werner Braun, <sup>3</sup>B. K. Muralidhara, and <sup>1</sup>James R. Halpert

<sup>1</sup>Skaggs School of Pharmacy & Pharmaceutical Sciences, University of California San Diego, 9500 Gilman Drive, La Jolla, CA 92093

<sup>2</sup>Department of Biochemistry and Molecular Biology and The Sealy Center for Structural Biology and Molecular Biophysics, University of Texas Medical Branch, Galveston, TX 77555-1031

<sup>3</sup>Pfizer Inc., PhRD-Global Biologics, 700 Chesterfield Parkway West, Chesterfield, MO 63017

\*Address correspondence to: Santosh Kumar, Ph.D., Skaggs School of Pharmacy & Pharmaceutical Sciences, Room 2231, University of California San Diego, 9500 Gilman Drive, La Jolla, CA 92093-0703; Email: s8kumar@ucsd.edu

<sup>¶</sup> Authors with equal contributions

Running title: Investigation of Conserved Sequence Motifs in P450 Family 2

**Table S1.** Cytochromes P450 analyzed for conserved motifs from 175 P450 family 2 sequences.

|                  |                  |              |                   |
|------------------|------------------|--------------|-------------------|
| CYP2A6_Human     | Cyp2c55_Mouse    | CYP2A2_Rat   | CYP2X3_Fogu       |
| CYP2A7v1_Human   | Cyp2c65_Mouse    | CYP2A3_Rat   | CYP2Y1_Fogu       |
| CYP2A13_Human    | Cyp2c66_Mouse    | CYP2B1_Rat   | CYP2Y2_Fogu       |
| CYP2B6_Human     | Cyp2c67_Mouse    | CYP2B2_Rat   | CYP2Z1_Fogu       |
| CYP2B7P1_Human   | Cyp2c68_Mouse    | CYP2B3_Rat   | CYP2Z2_Fogu       |
| CYP2C8_Human     | Cyp2c69_Mouse    | CYP2C6_Rat   | CYP2K7_Zebrafish  |
| CYP2C9_Human     | Cyp2c70_Mouse    | CYP2C7_Rat   | CYP2K8_Zebrafish  |
| CYP2C18_Human    | Cyp2c73-ps_Mouse | CYP2C11_Rat  | CYP2K16_Zebrafish |
| CYP2C19_Human    | Cyp2ac1_Mouse    | CYP2C12_Rat  | CYP2K17_Zebrafish |
| CYP2D6_Human     | Cyp2d22_Mouse    | CYP2C13_Rat  | CYP2K18_Zebrafish |
| CYP2D7P1_Human   | Cyp2dww_Mouse    | CYP2C22_Rat  | CYP2K19_Zebrafish |
| CYP2D8P1_Human   | Cyp2d11_Mouse    | CYP2C23_Rat  | CYP2K20_Zebrafish |
| CYP2E1_Human     | Cyp2d10_Mouse    | CYP2D2_Rat   | CYP2K21_Zebrafish |
| CYP2F1_Human     | Cyp2d9_Mouse     | CYP2D3_Rat   | CYP2N13_Zebrafish |
| CYP2G1P_Human    | Cyp2d32-ps_Mouse | CYP2D4_Rat   | CYP2P6_Zebrafish  |
| CYP2G2P_Human    | Cyp2d12_Mouse    | CYP2D18_Rat  | CYP2P7_Zebrafish  |
| CYP2J2_Human     | Cyp2d33-ps_Mouse | CYP2D5_Rat   | CYP2P8_Zebrafish  |
| CYP2R1_Human     | Cyp2d34_Mouse    | CYP2E1_Rat   | CYP2P9_Zebrafish  |
| CYP2S1_Human     | Cyp2d13_Mouse    | CYP2F4_Rat   | CYP2P10_Zebrafish |
| CYP2T2P_Human    | Cyp2d35-ps_Mouse | CYP2G1_Rat   | CYP2R1_Zebrafish  |
| CYP2T3P_Human    | Cyp2d36-ps_Mouse | CYP2J3_Rat   | CYP2U1_Zebrafish  |
| CYP2U1_Human     | Cyp2d37-ps_Mouse | CYP2A13_Dog  | CYP2V1_Zebrafish  |
| CYP2W1_Human     | Cyp2d40_Mouse    | CYP2B11_Dog  | CYP2X6_Zebrafish  |
| CYP2AB1P_Human   | Cyp2d41-ps_Mouse | CYP2C21_Dog  | CYP2X8_Zebrafish  |
| CYP2AC1P_Human   | Cyp2d26_Mouse    | CYP2C41_Dog  | CYP2X10_Zebrafish |
| Cyp2a4_Mouse     | Cyp2e1_Mouse     | CYP2D15_Dog  | CYP2X11_Zebrafish |
| Cyp2a5_Mouse     | Cyp2f2_Mouse     | CYP2F_Dog    | CYP2X1_Zebrafish  |
| Cyp2a12_Mouse    | Cyp2g1_Mouse     | CYP2G1_Dog   | CYP2Y3_Zebrafish  |
| Cyp2a22_Mouse    | Cyp2j5_Mouse     | CYP2J_Dog    | CYP2Y4_Zebrafish  |
| Cyp2a21-ps_Mouse | Cyp2j9_Mouse     | CYP2R1_Dog   | CYP2AA1_Zebrafish |
| Cyp2b9_Mouse     | Cyp2j6_Mouse     | CYP2S1_Dog   | CYP2AA2_Zebrafish |
| Cyp2b10_Mouse    | Cyp2j8_Mouse     | CYP2U1_Dog   | CYP2AA3_Zebrafish |
| Cyp2b13_Mouse    | Cyp2j11_Mouse    | CYP2W1_Dog   | CYP2AA5_Zebrafish |
| Cyp2b19_Mouse    | Cyp2j7_Mouse     | CYP2AC1_Dog  | CYP2AA6_Zebrafish |
| Cyp2b23_Mouse    | Cyp2j12_Mouse    | CYP2K9_Fogu  | CYP2AA7_Zebrafish |
| Cyp2c29_Mouse    | Cyp2j13_Mouse    | CYP2K10_Fogu | CYP2AA8_Zebrafish |
| Cyp2c37_Mouse    | Cyp2r1_Mouse     | CYP2K11_Fogu | CYP2AD2_Zebrafish |
| Cyp2c38_Mouse    | Cyp2s1_Mouse     | CYP2N9_Fogu  | CYP2AD3_Zebrafish |
| Cyp2c39_Mouse    | Cyp2t4_Mouse     | CYP2N10_Fogu | CYP2AD6_Zebrafish |
| Cyp2c40_Mouse    | Cyp2u1_Mouse     | CYP2N11_Fogu | CYP2AE1_Zebrafish |
| Cyp2c44_Mouse    | Cyp2w1_Mouse     | CYP2N12_Fogu |                   |
| Cyp2c50_Mouse    | Cyp2ab1_Mouse    | CYP2P4_Fogu  |                   |
| Cyp2c52-ps_Mouse | CYP2B4_Rabbit    | CYP2R1_Fogu  |                   |
| Cyp2c53-ps_Mouse | CYP2B5_Rabit     | CYP2U1_Fogu  |                   |
| Cyp2c54_Mouse    | CYP2c5_Rabit     | CYP2X2_Fogu  |                   |

**Table S2.** Oligonucleotides (forward and reverse primers) used in PCR for site-directed mutagenesis of CYP2B4dH/H226Y (H226Y).

| Mutants            | Oligonucleotides                                                                                                   |
|--------------------|--------------------------------------------------------------------------------------------------------------------|
| K186A              | 5'-TCCATTGTCTTTGGAG <b>C</b> ACGCTTTGACTACAAG-3'<br>5'-CTTGTAGTCAAAGCGT <b>G</b> CTCCAAAGACAATGGA-3'               |
| R187A              | 5'-ATTGTCTTTGGAAA <b>A</b> GCATTTGACTACAAGGACCCC-3'<br>5'-GGGGTCCTTGTAGTCAAAT <b>G</b> CTTTTCCAAAGACAAT-3'         |
| R187K              | 5'-TCCATTGTCTTTGGAAAA <b>A</b> AGTTTGACTACAAGGACCCC-3'<br>5'-GGGGTCCTTGTAGTCAA <b>A</b> CTTTTTTCCAAAGACAATGGA-3'   |
| F188A              | 5'-ATTGTCTTTGGAAA <b>A</b> CGCG <b>C</b> AGACTACAAGGACCCC-3'<br>5'-GGGGTCCTTGTAGT <b>C</b> TGCGGTTTTCCAAAGACAAT-3' |
| D189A              | 5'-TTTGGAAAACGCTTTGCCTACAAGGACCCCGTGTTTC-3'<br>5'-GAACACGGGGTCCTTGTAG <b>G</b> CAAAGCGTTTTCCAAA-3'                 |
| Y190A              | 5'-AAACGCTTTGAC <b>G</b> CCAAGGACCCCGTG-3'<br>5'-CACGGGGTCCTT <b>G</b> GCGTCAAAGCGTTT-3'                           |
| K191A              | 5'-AAACGCTTTGACTAC <b>G</b> CGGACCCCGTGTTTCCTG-3'<br>5'-CAGGAACACGGGGTCC <b>G</b> CGTAGTCAAAGCGTTT-3'              |
| D192A              | 5'-TTTACTACAAGGCCCCCGTGTTTCCTG-3'<br>5'-CAGGAACACGGGG <b>C</b> CTTGTAGACAAA-3'                                     |
| R187A <sup>1</sup> | 5'-GTGTTTGGAGAGGCCTTTGACTACACA-3'<br>5'-TGTGTAGTCAAAG <b>G</b> CCTCTCCAAACAC-3'                                    |
| D192A <sup>1</sup> | 5'-TTTACTACACAGCCCGCCAGTTTCCTG-3'<br>5'-CAGGA <b>A</b> CTGGCG <b>G</b> CCTGTGTAGTCAA-3'                            |

The nucleotides changed to make the desired mutation are in boldface. <sup>1</sup>The mutants were created in CYP2B1dH.

**Table S3.** PCPmer motifs of CYP2, CYP2A, CYP2B, CYP2C, CYP2D, and CYP2J enzymes generated from the sequences presented in Table S1.

| CSM | <b>CYP2</b><br><i>CYP2B4_Rabbit</i>        | <b>CYP2A</b><br><i>CYP2A6_Human</i>         | <b>CYP2B</b><br><i>CYP2B4_Rabbit</i>                 | <b>CYP2C</b><br><i>CYP2C8_Human</i>                 | <b>CYP2D</b><br><i>CYP2D6_Human</i>       | <b>CYP2J</b><br><i>CYP2J2_Human</i>               |
|-----|--------------------------------------------|---------------------------------------------|------------------------------------------------------|-----------------------------------------------------|-------------------------------------------|---------------------------------------------------|
| 1   | <sup>32</sup> PGPSPLPVLGN <sup>42</sup>    | <sup>34</sup> PPGPTPLPFIG <sup>44</sup>     | <sup>31</sup> PPGPSPLPVLG <sup>41</sup>              | <sup>30</sup> PPGPTP <sup>35</sup>                  | <sup>33</sup> YPPGP <sup>37</sup>         | <sup>40</sup> PKNYPPGP <sup>47</sup>              |
| 2   | <sup>62</sup> YGDVFTVYLG <sup>71</sup>     | <sup>63</sup> ERYGPFVFTIHLGPR <sup>76</sup> | <sup>61</sup> KYGD <sup>64</sup>                     | <sup>59</sup> KVYGP <sup>63</sup>                   | <sup>65</sup> FGDVFS <sup>70</sup>        |                                                   |
| 3   | <sup>93</sup> EAFSGRGKIA <sup>102</sup>    | <sup>99</sup> SGRGEQA <sup>105</sup>        | <sup>96</sup> SGRGKIA <sup>102</sup>                 |                                                     |                                           |                                                   |
| 4   | <sup>118</sup> GERWRALRRF <sup>127</sup>   |                                             | <sup>111</sup> YGVIFANGERW <sup>121</sup>            | <sup>109</sup> GLGISSNGKRWK<br>EIRRF <sup>126</sup> |                                           |                                                   |
| 5   | <sup>133</sup> RDFGMGK <sup>139</sup>      |                                             | <sup>136</sup> GMGKRSVE <sup>143</sup>               | <sup>135</sup> GMGK <sup>138</sup>                  | <sup>143</sup> GLGKKSLEQW <sup>152</sup>  | <sup>149</sup> GLGKKSLE <sup>156</sup>            |
| 6   | <sup>162</sup> GALLDN <sup>167</sup>       |                                             |                                                      |                                                     |                                           |                                                   |
| 7   | <sup>174</sup> ITSNIIC <sup>180</sup>      |                                             |                                                      | <sup>172</sup> CAPCNVIC <sup>179</sup>              | <sup>180</sup> KAVSN <sup>184</sup>       | <sup>187</sup> AVSNIIC <sup>193</sup>             |
| 8   | <sup>187</sup> RFDYKD <sup>192</sup>       | <sup>193</sup> YKDKEFLS <sup>200</sup>      | <sup>177</sup> NIICSIVFGKRF<br>YKDPVF <sup>195</sup> | <sup>187</sup> FDYKD <sup>191</sup>                 | <sup>192</sup> GRRFEYDDP <sup>200</sup>   | <sup>198</sup> GERFEYQDSWFQ<br>Q <sup>210</sup>   |
| 9   | <sup>217</sup> FELFSGF <sup>223</sup>      |                                             | <sup>210</sup> SSFSSQVFELFS <sup>221</sup>           |                                                     |                                           |                                                   |
| 10  | <sup>227</sup> FPGTHRQI <sup>234</sup>     |                                             | <sup>226</sup> HFPGTH <sup>231</sup>                 | <sup>225</sup> CFPGTH <sup>230</sup>                |                                           |                                                   |
| 11  | <sup>261</sup> PRDFIDVY <sup>268</sup>     |                                             | <sup>257</sup> DPSNPRDFIDVY <sup>268</sup>           | <sup>260</sup> PRDFMDC <sup>266</sup>               |                                           |                                                   |
| 12  | <sup>295</sup> LFFAGTET <sup>302</sup>     | <sup>301</sup> GGTETVS <sup>307</sup>       | <sup>298</sup> AGTETTS <sup>304</sup>                | <sup>297</sup> AGTETTS <sup>303</sup>               |                                           | <sup>307</sup> DLFFAGTE <sup>314</sup>            |
| 13  | <sup>325</sup> QKEIEQVIG <sup>333</sup>    |                                             |                                                      |                                                     | <sup>334</sup> EIDDVIG <sup>340</sup>     | <sup>340</sup> EIDRVIG <sup>346</sup>             |
| 14  | <sup>347</sup> PYTDAVIHE <sup>355</sup>    | <sup>349</sup> MPYMEA <sup>354</sup>        | <sup>346</sup> MPYTDA <sup>351</sup>                 | <sup>346</sup> PYTDAVVH <sup>353</sup>              | <sup>353</sup> MPYTDAVIHE <sup>362</sup>  | <sup>358</sup> SMPYTNAVIH <sup>367</sup>          |
| 15  | <sup>380</sup> YVIPKN <sup>385</sup>       |                                             | <sup>379</sup> GYVIPKNTE <sup>387</sup>              | <sup>379</sup> YLIPKG <sup>384</sup>                | <sup>386</sup> GFRIPKG <sup>392</sup>     |                                                   |
| 16  | <sup>405</sup> PNTFNPGHF <sup>413</sup>    |                                             | <sup>410</sup> PGHFLDANGA <sup>419</sup>             | <sup>408</sup> DPGHFLDKNG <sup>417</sup>            |                                           | <sup>422</sup> NPDHFLENGQFKK<br>RE <sup>436</sup> |
| 17  | <sup>428</sup> PFSLG <sup>432</sup>        | <sup>428</sup> AFVPFSIG <sup>435</sup>      | <sup>428</sup> PFSLGKRICLG <sup>238</sup>            |                                                     | <sup>432</sup> AFLPFSAG <sup>439</sup>    | <sup>440</sup> PFSIGKRACLG <sup>450</sup>         |
| 18  | <sup>436</sup> CLGEGIARTELF <sup>447</sup> |                                             |                                                      | <sup>435</sup> CAGEGLA <sup>441</sup>               | <sup>443</sup> CLGEPLA <sup>449</sup>     |                                                   |
| 19  | <sup>451</sup> TTILQNF <sup>457</sup>      | <sup>458</sup> QNFRLK <sup>463</sup>        | <sup>455</sup> QNFSIASPVPP <sup>465</sup>            |                                                     |                                           |                                                   |
| 20  | <sup>481</sup> PPSYQIR <sup>487</sup>      |                                             | <sup>476</sup> GVGNVPPSY <sup>484</sup>              | <sup>480</sup> PPSYQICFIP <sup>489</sup>            |                                           |                                                   |
|     |                                            | <b>Specific to CYP2A</b>                    | <b>Specific to CYP2B</b>                             | <b>Specific to CYP2C</b>                            | <b>Specific to CYP2D</b>                  | <b>Specific to CYP2J</b>                          |
|     |                                            | <sup>112</sup> KGYG <sup>115</sup>          | <sup>149</sup> EARCLVEELRKS<br>G <sup>162</sup>      | <sup>7</sup> LVLCLSFMLLFS<br>LW<br>RQ <sup>22</sup> | <sup>7</sup> VPLAVIVAIF <sup>16</sup>     | <sup>21</sup> LLLGTVAF <sup>28</sup>              |
|     |                                            | <sup>119</sup> SNGERAK <sup>125</sup>       | <sup>272</sup> MEKDK <sup>276</sup>                  | <sup>78</sup> HGYEAVKEALIDN<br>G <sup>91</sup>      | <sup>50</sup> DFQNTPY <sup>56</sup>       | <sup>51</sup> PFLGNFFLVD <sup>60</sup>            |
|     |                                            | <sup>139</sup> GVGKRGIEE <sup>147</sup>     | <sup>282</sup> EFHHQN <sup>287</sup>                 | <sup>147</sup> EEAHC <sup>151</sup>                 | <sup>82</sup> NGLAAVRE <sup>89</sup>      | <sup>73</sup> KKYGNLFS <sup>80</sup>              |
|     |                                            | <sup>151</sup> EEAG <sup>154</sup>          | <sup>314</sup> MLKYPH <sup>319</sup>                 | <sup>158</sup> KTKASPCDP <sup>166</sup>             | <sup>94</sup> HGEDTADRPPVP <sup>105</sup> | <sup>93</sup> GLPLIKE <sup>99</sup>               |
|     |                                            | <sup>204</sup> MMLGIFQF <sup>211</sup>      | <sup>361</sup> DLIPFGVPH <sup>369</sup>              | <sup>211</sup> PWIQVCNNFP <sup>220</sup>            | <sup>111</sup> GFGPRSQ <sup>118</sup>     | <sup>107</sup> NFGNRP <sup>112</sup>              |
|     |                                            | <sup>217</sup> GQLYEMFSSVM <sup>227</sup>   |                                                      | <sup>281</sup> EFNIENL <sup>287</sup>               | <sup>122</sup> ARYGPAW <sup>128</sup>     | <sup>117</sup> REHIFKKN <sup>125</sup>            |
|     |                                            | <sup>243</sup> GLEDF <sup>247</sup>         | <sup>395</sup> ALHDPRY <sup>401</sup>                | <sup>321</sup> AKVQEE <sup>326</sup>                | <sup>156</sup> EAACLC <sup>161</sup>      | <sup>129</sup> SSGQAWKE <sup>136</sup>            |
|     |                                            | <sup>260</sup> DPNSP <sup>264</sup>         |                                                      | <sup>332</sup> GRHRSPCMQD <sup>341</sup>            |                                           | <sup>175</sup> GQFPDPH <sup>181</sup>             |
|     |                                            |                                             |                                                      | <sup>465</sup> KNLNTTA <sup>471</sup>               | <sup>225</sup> NAVSVLLHIPALAG             | <sup>216</sup> DEVTYLEAS <sup>224</sup>           |

<sup>275</sup>MQEEKPNTEFY  
**LKN**<sup>290</sup>  
<sup>311</sup>RYGF<sup>314</sup>  
<sup>318</sup>MKHPEVEAKVHEE  
**ID**<sup>332</sup>  
<sup>367</sup>PMSLARRVKK<sup>376</sup>  
<sup>380</sup>FRDFFLPKG<sup>388</sup>  
<sup>468</sup>PKDIDVSP<sup>475</sup>  
<sup>487</sup>YTMSFLP<sup>493</sup>

|                                            |                                          |
|--------------------------------------------|------------------------------------------|
| <b>K</b> <sup>239</sup>                    |                                          |
| <sup>274</sup> AFLAEMEKAKGN <sup>285</sup> | <sup>239</sup> FLPGPHQ <sup>245</sup>    |
| <sup>321</sup> MILHPDVQ <sup>328</sup>     | <sup>251</sup> WKKLK <sup>255</sup>      |
| <sup>345</sup> PEMGD <sup>349</sup>        | <sup>265</sup> HRKDWNP <sup>271</sup>    |
| <sup>375</sup> THMTSRD <sup>381</sup>      | <sup>284</sup> EMSKH <sup>288</sup>      |
| <sup>422</sup> DAQGH <sup>426</sup>        | <sup>295</sup> SFHEENLIC <sup>303</sup>  |
| <sup>487</sup> PSPYELCA <sup>494</sup>     | <sup>321</sup> RWALLY <sup>326</sup>     |
|                                            | <sup>331</sup> PEIQEK <sup>336</sup>     |
|                                            | <sup>373</sup> GNIPQNVPRE <sup>383</sup> |
|                                            | <sup>391</sup> AGYHLPKGTM <sup>400</sup> |
|                                            | <sup>409</sup> HRDPTEWATP <sup>418</sup> |
|                                            | <sup>474</sup> PNNEKLS <sup>480</sup>    |
|                                            | <sup>491</sup> PVSHRLC <sup>497</sup>    |

The top panel represents the common motifs in subfamilies that are also present in the CYP2 family, whereas the bottom panel represents the motifs that are specific to each subfamily. Residue numbers in the motifs for the CYP2 family and each subfamily are based on the specific P450 indicated in the first row. The CSM8, which is the subject of the current study, is presented in bold. CSM 1, 8, and 14 are common in all subfamilies.
